# Supplementary material for: A Prospective Investigation of Circulating Metabolome Identifies Potential Biomarkers for Gastric Cancer Risk
Source: Oxford University Press journal article supplement (doi:10.1158/1055-9965.epi-20-1633), 2021-04-01
Supplement: 10559965epi201633-sup-255555_3_supp_6967556_qpj6tv.docx [file 10559965epi201633-sup-255555_3_supp_6967556_qpj6tv.docx]

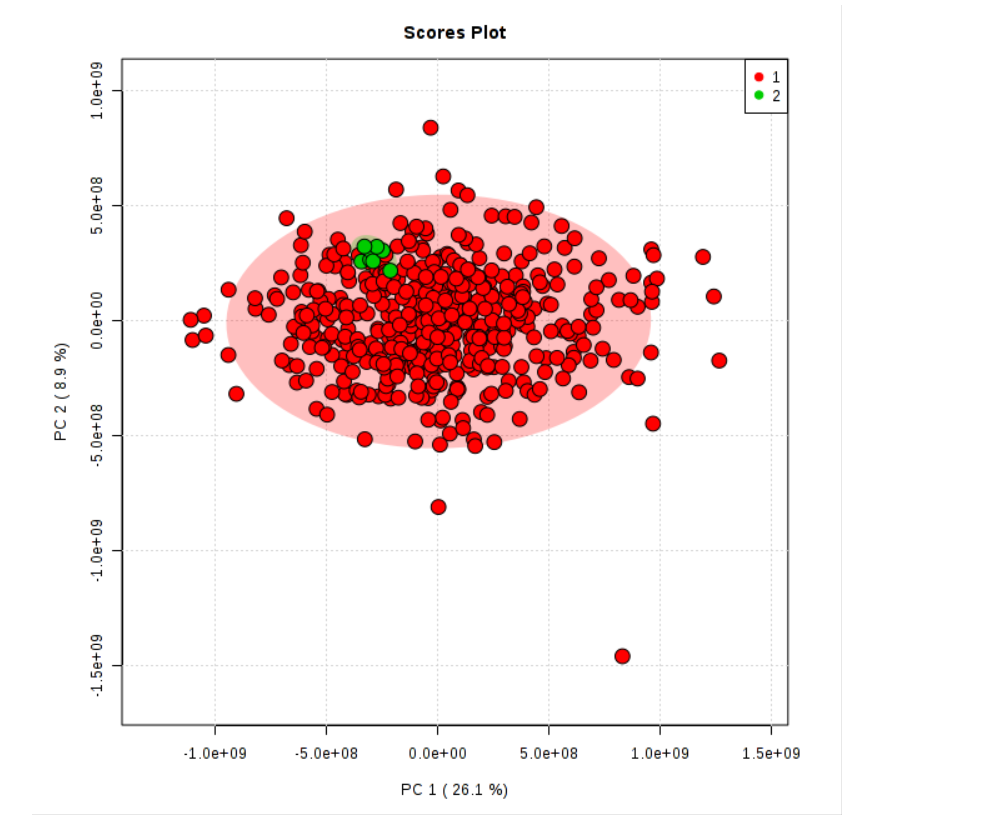


Supplementary Figure 1.Scores plot for first two PCs calculated from metabolomics data. Green dots represent QC samples. Red dots represent study samples.
