# Supplementary material for: A Prospective Investigation of Circulating Metabolome Identifies Potential Biomarkers for Gastric Cancer Risk
Source: Oxford University Press journal article supplement (doi:10.1158/1055-9965.epi-20-1633), 2021-04-01
Supplement: 10559965epi201633-sup-255555_3_supp_6967559_qpj6tw.docx [file 10559965epi201633-sup-255555_3_supp_6967559_qpj6tw.docx]

| Supplementary Table 4. Associations between the three identified xenobiotic metabolites and monthly tea consumption | | | | |
| --- | --- | --- | --- | --- |
|  | Spearman rho | P | Beta a | P a |
| Overall |  |  |  |  |
| 3-hydroxypyridine sulfate | 0.2360 | 9.30x10-8 | 0.0441 | 0.00334 |
| quinate | 0.3142 | 6.38x10-13 | 0.0632 | 1.62x10-5 |
| N-(2-furoyl) glycine | 0.1042 | 0.01982 | 0.0321 | 0.03351 |
| Male |  |  |  |  |
| 3-hydroxypyridine sulfate | 0.1750 | 0.00554 | 0.0213 | 0.11523 |
| quinate | 0.2990 | 1.47x10-6 | 0.0544 | 4.02x10-5 |
| N-(2-furoyl) glycine | 0.0768 | 0.2261 | 0.0175 | 0.21598 |
| Female |  |  |  |  |
| 3-hydroxypyridine sulfate | 0.1588 | 0.01194 | 0.134 | 0.00855 |
| quinate | 0.1634 | 0.00966 | 0.133 | 0.00938 |
| N-(2-furoyl) glycine | 0.0837 | 0.18713 | 0.0878 | 0.08648 |
| a Linear regression with adjustment of age at interview and sex where was appropriate. The tea intake, g/month was converted to 50g unit. | | | | |
