# Supplementary material for: A Prospective Investigation of Circulating Metabolome Identifies Potential Biomarkers for Gastric Cancer Risk
Source: Oxford University Press journal article supplement (doi:10.1158/1055-9965.epi-20-1633), 2021-04-01
Supplement: 10559965epi201633-sup-255555_3_supp_6967560_qpj6tw.docx [file 10559965epi201633-sup-255555_3_supp_6967560_qpj6tw.docx]

| Supplementary Table 3. Sensitivity analysis by restricting to case-control pairs with comparable time to last meal hours (± 2 hour, 210 pairs) for top associated metabolites | | |
| --- | --- | --- |
|  | OR (95% CI) | P |
| sphinganine | 1.61 (1.27-2.05) | 8.66x10-5 |
| orotate | 1.73 (1.31-2.29) | 1.36x10-4 |
| 1-(1-enyl-palmitoyl)-GPE (P-16:0) | 1.54 (1.22-1.95) | 3.09x10-4 |
| 1-(1-enyl-stearoyl)-GPE (P-18:0) | 1.53 (1.20-1.95) | 5.95x10-4 |
| glycerophosphoethanolamine | 1.55 (1.20-1.99) | 7.36x10-4 |
| 1-palmitoyl-GPC (16:0) | 1.47 (1.15-1.89) | 0.00246 |
| N6-methyllysine | 1.40 (1.13-1.74) | 0.00249 |
| 1-stearoyl-GPC (18:0) | 1.45 (1.13-1.87) | 0.00352 |
| 5alpha-pregnan-3beta20beta-diol monosulfate | 1.41 (1.12-1.78) | 0.00371 |
| glutamate | 1.42 (1.12-1.80) | 0.00389 |
| methylmalonate (MMA) | 1.41 (1.11-1.80) | 0.00492 |
| 1-(1-enyl-palmitoyl)-GPC (P-16:0) | 1.39 (1.10-1.75) | 0.00521 |
| 3-hydroxypyridine sulfate | 0.70 (0.54-0.90) | 0.00572 |
| N-(2-furoyl) glycine | 0.71 (0.55-0.91) | 0.0071 |
| 1-(1-enyl-oleoyl)-2-docosahexaenoyl-GPE (P-18:1/22:6) | 1.36 (1.08-1.71) | 0.01016 |
| quinate | 0.74 (0.58-0.94) | 0.01299 |
| cysteine | 0.75 (0.59-0.95) | 0.01563 |
| 5alpha-pregnan-diol disulfate | 1.34 (1.06-1.70) | 0.01601 |
| The same covariates listed in Table 2 were included in the regression analysis. | | |
